# Supplementary material
Source: PubMed Central journal article supplement (PMC139231)
Supplement: pnas_99_26_16841__2.pdf [file pnas_99_26_16841__2.pdf]

## A Snail

Mm Snail MPRSFLVRKPSDRRKNPNYSELQDACVEFTFQQPYDQAHLLAAIPPEVLNPAASLPT-LIWDLSL-LVP----QVRVAVAWT--LPLRESKAV----ELTSL----DEDSGK-SSQPSS  
Gg Snail MPRSFLVKHFSASKKNPNYSE--LESQTVLAAPLLLETALSVIPPEVLSPGAYYPP-LVWDAG-LLSSLPAGLGTAEAEAGGAAP-----ALDLTTLSSSEDEGK-SSGPPS  
Mc Snail KKHFSASKKNPNYSE--LESQTVIVSPFLYEKCLSLIPQPEVLSFGAYYPP-LVWDGT-LLSNFFTSETEY---KTCASP-SPEK-----PLDLTSLSSSEDEGK-TSDPPS  
Em Snail KKHLSYSKKNPNYSE--LESQTVIVSPFLYEKYSLS-VQPDILSTGPIYPP-LVWDGT-LLSNFFTSETEY---PKASAPSPSPSK-----PLDLTSLSSSEDEGK-TSDPPS  
Dr snail1 MPRSFLVKKYFT-SKRPNYSE--LEQNDTSPDRYPLAELPAVSNDF---PVTCLTGLVWDVS-LLPSLHNSPSTLSTNQGLDLSSPS-----ISCSSS--GEEDEGR-TSDPPS  
Dr snail2 MPRSFLVKKYFT-NKKPNYSE--LESQTD--RYAVVPCFPLDDP---LVPKYPSMLVWSSS-ALP---FPGVSSVSCPPAPLDLSSPS-----SSSSS--GEEDEGR-TSDPPS  
Tr snail1 MPRSFLVKKYFA-KQKPNYSE--LEQNDTQESYFPAELPSADSS----AATCLTGLVWDLS-VLPTLYLPTSQTEFTSIPGDLSSPS-----LSSASSCGEEDGR-TSDPPS  
Tr snail2 MPRSFLVKKYFNS-NKKPCYRCHLESQSFAFVESPRAELPAQNDSS---PLTCYPNQOFFISDPLPAPLSPINPVSPSS--SPLDLSSP-----SSSSE--EEDDGR-SSDPPS  
Sc Snail SE--LESQTVIISPFLYEKYPVPIVQPEILRSAAAYPA-IVWDGT-LISSLCSAELEASLGGQKSEPPADSSKRQRQAHDLASLSSSEEDGK-TSDPPS

Mm Snail PPS---PAPSSFSSTASSLEAEAFIAFPGLG-QLPKQLARLSVAKDPQSRKIFNCKYCNKEYLSLGLKMHIRSHLTPCVCTCGKAFSRPWLLQGHVRTHTGKFPFSCSHCNRAFADR  
Gg Snail PASAPAAAERFCAQCAKAYSTFAGLSKHKQLH-----CDAQTRKFSCKYCEKEYVSLGALKMHIRSHLTPCVCKMCGKAFSRPWLLQGHVRTHTGKFPFSCSHCNRAFADR  
Mc Snail PASSATEAEKFCQCSKNSYSTFAGLSKHKQLH-----CDSQTRKFSCKYCEKEYVSLGALKMHIRSHLTPCVCKICGKAFSRPWLLQGRIR  
Em Snail PASSATEAEKFCQCSKNSYSTFAGLSKHKQLH-----CDSQTRKFSCKYCEKEYVSLGALKMHIRSHLTPCVCKICGKAFSRPWLLQGHIR  
Dr snail1 PD---SSDTYHP---QTSRPR-RSNKSR---QREDKSEAAVTAASRPAFFCKHCPKEYNSLGLKMHIRSHLTPCVCTCGKAFSRPWLLRGHIRTHTGERPFSCPHCNRAFADR  
Dr snail2 PD---PSDRFQCAHCGKSCSSPAQLSRHQLAHCSPQDQISGRTSSSPAGPPFHKHCPKEYNSLGLKMHIRSHLTPCVCTCGKAFSRPWLLRGHIRTHTGERPFSCPHCNRAFADR  
Tr snail1 PE---PVHTFAP---RQRMKCTGVMARSSP---PEEEEEERAPATAA-RPAFLCKHCPKEYNSLGLKMHIRSHLTPCVCTCGKAFSRPWLLRGHIRTHTGERPFSCPHCNRAFADR  
Tr snail2 PDI---IQHIYHCLHCSNSYSLSALSHHQLSH-FPQTQHTSSLPTEVSARPAFHCKHCPKEYNSLGLKMHIRSHLTPCVCTCGKAFSRPWLLRGHIRTHTGERPFACQLCNRAFADR  
Sc Snail PDSATEAEKFCQCNHCSKNSYSTFAGLSKHKQLH-----CEPQARKSFNCKYCEKEYVSLGALKMHIRSH

Mm Snail SNLRAHLQTHSDVKRYQCQACAR-TFSRMSLLHKHESGCGGPR  
Gg Snail SNLRAHLQTHSDVKRYQCKTCSR-TFSRMSLLHKHEETGCGGAR  
Dr snail1 SNLRAHLQTHADVKKYQCSTCSR-TFSRMSLLQKHSAAGCCPSTANVQ  
Dr snail2 SNLRAHLQTHSEVKKYQCGSCSRRTFMRMSLLHKHTLSGCCPAL  
Tr snail1 SNLRAHLQTHAEVKKYQCIGCSR-TFSRMSLLQKHSSGCCSAAV  
Tr snail2 SNLRAHLQTHSEVKKYQCGSCAR-TFSRMSLLHKHNASGCCPPS

## B Slug

Mm Slug MPRSFLVKHFNASKKNPNYSELDTHT-VIISPFLYESYPIVPIKPEILTSGLAYSPITVWTS-SAAPLHSPPLPSGLSPLTGYSSS-----LGRVSPPPP-SDTSSKDHSGSES  
Gg Slug MPRSFLVKHFNASKKNPNYSELDTHT-VIISPFLYESYVPIIPQPEILSSVAYNPITVWT--TTGLLPSPLPNDLSPSLSGYSS-----LGRVSPPPP-SDTSSKDHSGSES  
Mc Slug KKHFNASKKNPNYSELDTHT-VIISPFLYESYVPIIPQPEILSSVAYNPITVWT--TTGLLPSPLPNDLSPSLSGYSS-----LGRVSPPPP-SDTSSKDHSGSES  
Em Slug KKHFNASKKNPNYSELDTHT-VIISPFLYESYVPIIPQPEILSSVAYNPITVWT--TTGLLPSPLPNDLSPSLSGYSS-----LGRVSPPPP-SDTSSKDHSGSES  
Dr slug MPRSFLVKHFNASKKNPNYSELDTHT-VIISPFLYESYVPIIPQPEILSSVAYNPITVWT--TTGLLPSPLPNDLSPSLSGYSS-----LGRVSPPPP-SDTSSKDHSGSES  
Tr slug MPRSFLVKHFNASKKNPNYSELDTHT-VIISPFLYESYVPIIPQPEILSSVAYNPITVWT--TTGLLPSPLPNDLSPSLSGYSS-----LGRVSPPPP-SDTSSKDHSGSES  
Sc Slug KKHFNASKKNPNYSELDTHT-VIISPFLYESYVPIIPQPEILSSVAYNPITVWT--TTGLLPSPLPNDLSPSLSGYSS-----LGRVSPPPP-SDTSSKDHSGSES

Mm Slug FIS-----DEEERLQP-KLSDPHAIEAEKFCQCNLCKNTYSTFSGLAKHKQLHCDASRKSFSCKYCDKEYVSLGALKMHIRSHLTPCVCKICGKAFSRPWLLQGHIRTHTGKFPFSCPH  
Gg Slug FIS-----DEEERIQS-KLSDPHAIEAEKFCQCNLCKNTYSTFSGLAKHKQLHCDASRKSFSCKYCDKEYVSLGALKMHIRSHLTPCVCKICGKAFSRPWLLQGHIRTHTGKFPFSCPH  
Mc Slug FIS-----DEEERIQS-KLSDPHAIEAEKFCQCNLCKNTYSTFSGLAKHKQLHCDASRKSFSCKYCDKEYVSLGALKMHIRSHLTPCVCKICGKAFSRPWLLRGHIRT  
Em Slug FIS-----DEEERIQS-KLSDPHAIEAEKFCQCNLCKNTYSTFSGLAKHKQLHCDASRKSFSCKYCDKEYVSLGALKMHIRSHLTPCVCKICGKAFSRPWLLQGHIR  
Dr slug PRS-----DEDERIQSTKLSLSD-----AEKFCQCNLCKNTYSTFSGLAKHKQLHCDASRKSFSCKYCDKEYVSLGALKMHIRSHLTPCVCKMCGKAFSRPWLLQGHIRTHTGKFPFSCPH  
Tr slug PRS-----DEDEQMLP-KLTDPHGABAEKFCQCNLCKNTYSTFSGLAKHKQLHCDASRKSFSCKYCDKEYVSLGALKMHIRSHLTPCVCKICGKAFSRPWLLQGHIRTHTGKFPFSCPH  
Sc Slug SIS-----DEEERIHP-KVSDHEGVDAEKFCQCNLCKNTYSTFSGLAKHKQLHCDASRKSFSCKYCDKEYVSLGALKMHIRSHLTPCVCKICGKAFSRPWLLQGHIR

MmSlug CNRAFADRNLRAHLQTHSDVKKYQCKNCSKTFMRMSLLHKHEESGCCVAH  
GgSlug CNRAFADRNLRAHLQTHSDVKNKYQCKNCSKTFMRMSLLHKHEESGCCVAH  
DrSlug CSRAFADRNLRAHLQTHSDVKKYQCKNCSKTFMRMSLLHKHEESGCCIAH  
TrSlug CNRAFADRNLRAHLQTHSDVKKYQCKNCSKTFMRMSLLHKHEESGCCVAH
