# Supplementary material
Source: PubMed Central journal article supplement (PMC139231)

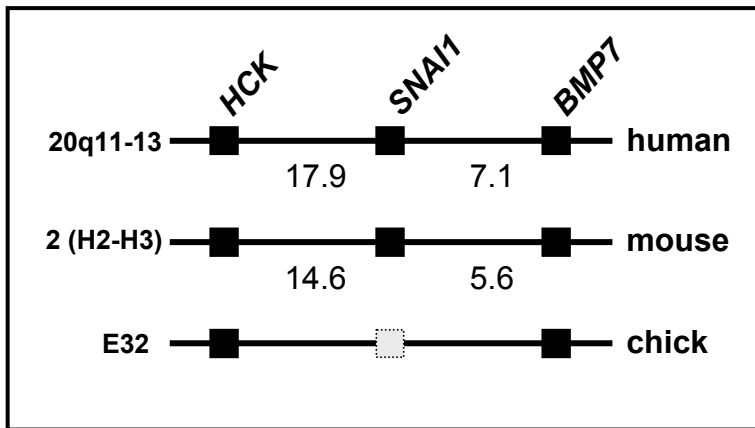

Supplement: pnas_99_26_16841__4.pdf [file pnas_99_26_16841__4.pdf]
